# Supplementary material for: Krüppel-like Factors Hypertrophy Modulation Following Isoproterenol-Induced Myocardial Damage
Source: Preprints.org preprint supplement (doi:10.20944/preprints202308.2187.v2), 2023-11-13
Supplement: Supplementary file 1 [file supplementary]

| **Day*** | **Body** | **Cardiac** | **Length **** | **Diameter **** |
| --- | --- | --- | --- | --- |
| **Weight**** | **Weight**** | **(L)** | **(D)** |
| 1 | 191 | 1 | 14.8 | 11.1 |
| 245 | 1 | 13.6 | 12 |
| 2 | 240 | 1 | 17.6 | 12 |
| 184 | 1 | 14 | 9.7 |
| 3 | 177 | 1 | 18.4 | 10.3 |
| 170 | 1 | 18.4 | 10.9 |
| 4 | 183 | 0.8 | 14.7 | 12 |
| 170 | 1 | 14.5 | 10 |
| 5 | 187 | 0.9 | 17.1 | 11.1 |
| 181 | 0.8 | 17 | 10.7 |
| 6 | 207 | 0.8 | 15 | 12.6 |
| 221 | 1 | 18.3 | 13.7 |
| 7 | 201 | 0.8 | 15.6 | 12.4 |
| 203 | 1 | 17.3 | 13.6 |
| 8 | 193 | 1 | 16.1 | 12.7 |
| 199 | 0.9 | 12.2 | 15.2 |
| 9 | 216 | 0.8 | 11.5 | 10.1 |
| 188 | 0.7 | 13.2 | 12 |
| 10 | 160 | 0.8 | 16.4 | 12.4 |
| 282 | 2 | 18.5 | 14.8 |
| 11 | 207 | 1.1 | 21.3 | 12.7 |
| 218 | 1 | 20.3 | 13.7 |
| 12 | 196 | 0.9 | 17.2 | 13.8 |
| 210 | 1 | 17.6 | 13.2 |
| 13 | 193 | 0.8 | 11.2 | 16 |
| 178 | 1 | 16.8 | 13.4 |
| 14 | 221 | 0.9 | 15.6 | 11.4 |
| 192 | 0.6 | 13.4 | 12 |
| 15 | 166 | 1 | 16.3 | 14.2 |
| 205 | 1.1 | 12 | 17.4 |
| 16 | 184 | 1.1 | 16 | 12.3 |
| 210 | 1 | 18.1 | 13.7 |
| 17 | 186 | 0.7 | 16.9 | 12.4 |
| 199 | 1.2 | 20.5 | 16 |
| 18 | 279 | 2 | 20 | 14 |
| 187 | 2 | 19 | 12 |
| 19 | 207 | 2 | 20 | 12 |
| 208 | 2 | 20.2 | 16 |
| 20 | 206 | 1 | 17 | 13.4 |
| 251 | 2 | 18 | 14.5 |
| 21 | 184 | 1 | 10.5 | 18.8 |
| 175 | 2 | 15.3 | 18 |
| * Repeat runs | |  |  |  |
